# Supplementary material for: Timing of Intubation and In-Hospital Mortality in Patients With Coronavirus Disease 2019
Source: PubMed Central journal article supplement — Crit Care Explor. 2020 Oct 21;2(10):e0254. doi: 10.1097/CCE.0000000000000254 (PMC7587418; doi:10.1097/cce.0000000000000254), 2020-10-21
Supplement: cc9-2-e0254-s001.pdf [file cc9-2-e0254-s001.pdf]

**Supplementary Table 1. Trends in Mechanical Ventilation by Week**

| Characteristic               | 02/21-03/12<br>N = 8 | 03/13-03/19<br>N = 26 | 03/20-03/26<br>N = 110 | 03/27-04/02<br>N = 169 | 04/03-04/09<br>N = 175 | 04/10-04/16<br>N = 114 | 04/17-04/23<br>N = 93 | 04/24-04/30<br>N = 60 | p-value |
|------------------------------|----------------------|-----------------------|------------------------|------------------------|------------------------|------------------------|-----------------------|-----------------------|---------|
| Time to Intubation, days     | 0.6 [0.5 - 3.8]      | 1.3 [0.6 - 2.7]       | 1.2 [0.3 - 2.6]        | 1.6 [0.5 - 4.1]        | 2.6 [0.7 - 5.5]        | 4.2 [0.7 - 8.6]        | 6.8 [0.8 - 11.5]      | 5.0 [0.5 - 11.8]      | <0.001  |
| Duration of Intubation, days | 10.5 [4.7, 18.8]     | 9.2 [5.9 – 23.7]      | 8.6 [4.0 – 13.4]       | 9.5 [4.8 – 15.9]       | 8.6 [3.9 – 20.8]       | 8.8 [2.4 – 15.5]       | 7.3 [3.1 – 20.6]      | 5.6 [1.9 – 15.3]      | 0.294   |
| Tracheostomy                 | 2 (25.0%)            | 5 (19.2%)             | 17 (15.5%)             | 36 (21.3%)             | 54 (30.9%)             | 24 (21.1%)             | 21 (22.6%)            | 11 (18.3%)            | 0.130   |
| Died in Hospital             | 6 (75.0%)            | 15 (57.7%)            | 64 (58.2%)             | 114 (67.5%)            | 116 (66.3%)            | 87 (76.3%)             | 63 (67.7%)            | 47 (79.7%)            | 0.070   |
